# Supplementary material for: Facile synthesis and electrochemical properties of two trinuclear ruthenium complexes based on star-shaped terpyridine derivatives
Source: Royal Society of Chemistry journal article supplement (doi:10.1039/b706419e), 2007-01-01

# Facile synthesis and electrochemical properties of two trinuclear ruthenium complexes based on star-shaped terpyridine derivatives

*Cédric R. Mayer,\* Frédéric Dumur, Fabien Miomandre, Eddy Dumas, Thomas Devic, Céline Fosse,  
and Francis Sécheresse*

**Figure S1.**  $^{13}\text{C}$  NMR spectrum of *L3B*.

**Figure S2.**  $^{13}\text{C}$  NMR spectrum of *Ru3B*.

**Figure S3.** Peak current vs. square root of the scan rate for compounds *Ru1* (0.8 mM), *Ru2* (0.4 mM) and *Ru3A* (0.27 mM) extracted from CVs.

**Figure S1.**  $^{13}\text{C}$  NMR spectrum of *L3B*.

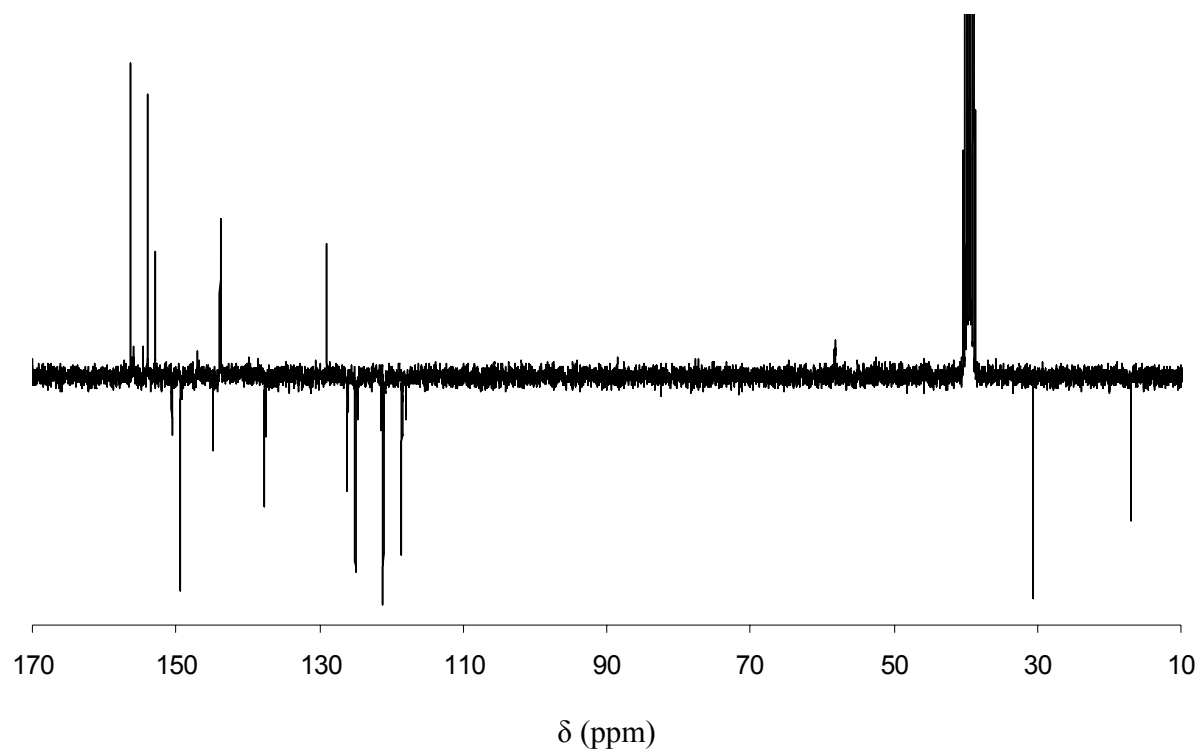

**Figure S2.**  $^{13}\text{C}$  NMR spectrum of *Ru3B*.

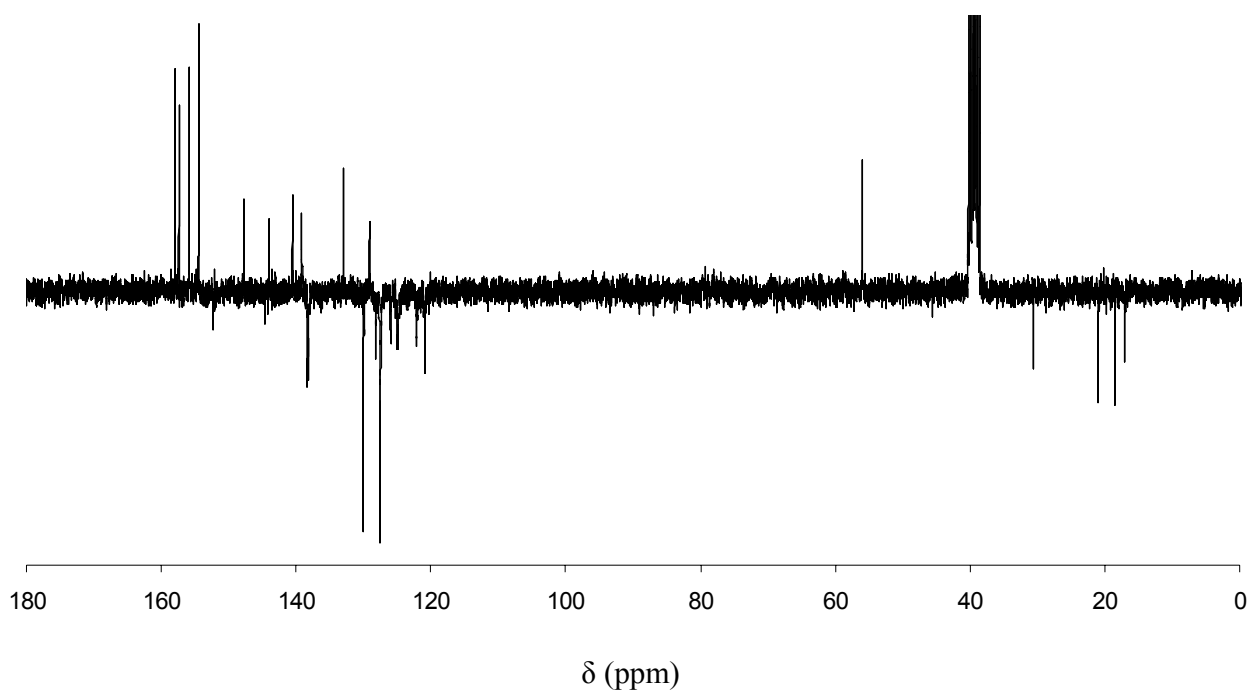

**Figure S3.** Peak current vs. square root of the scan rate for compounds *Ru1* (0.8 mM), *Ru2* (0.4 mM) and *Ru3A* (0.27 mM) extracted from CVs.

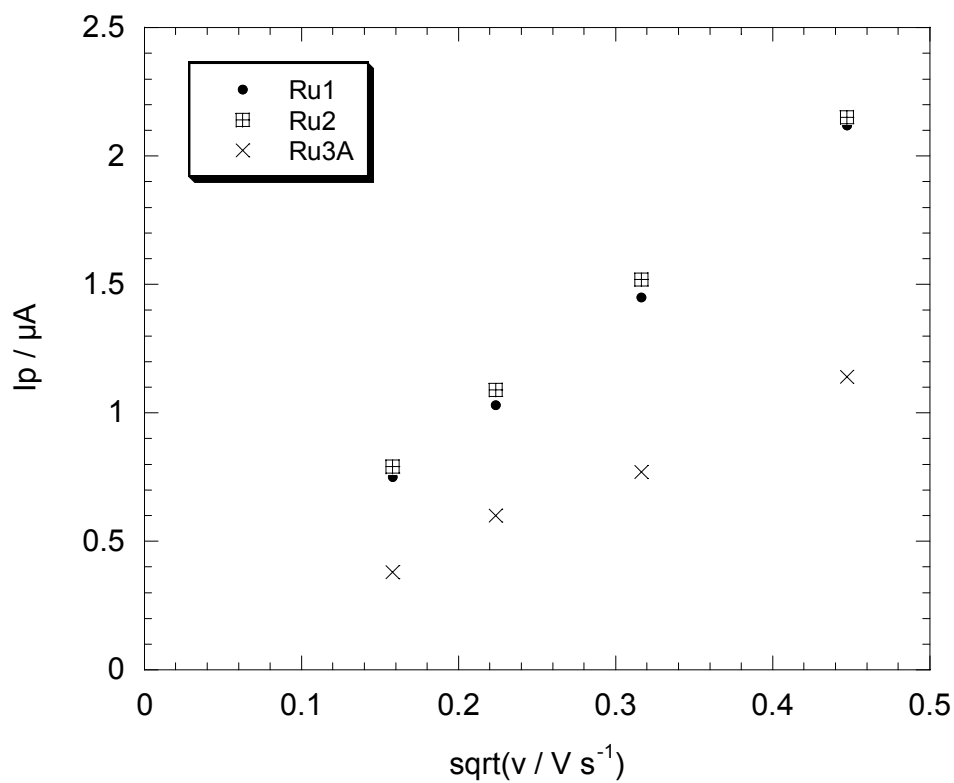

Supplement: b706419e.pdf [file b706419e.pdf]
